# Supplementary material for: Sensorimotor brain dynamics reflect architectural affordances
Source: PubMed Central journal article supplement — Proc Natl Acad Sci U S A. 2019 Jun 12;116(29):14769–78. doi: 10.1073/pnas.1900648116 (PMC6642393; doi:10.1073/pnas.1900648116), 2019-06-12
Supplement: pnas.1900648116.sapp.pdf [file pnas.1900648116.sapp.pdf]

# PNAS

[www.pnas.org](http://www.pnas.org)

## Supplementary Information for

Sensory-motor brain dynamics reflect architectural affordances

Zakaria Djebbara\* ORCID: 0000-0003-2370-6092

Lars Brorson Fich ORCID: 0000-0002-6760-0540

Laura Petrini ORCID: 0000-0002-5320-1944

Klaus Gramann ORCID: 0000-0003-2673-1832

\*Zakaria Djebbara

Email: [zadj@create.aau.com](mailto:zadj@create.aau.com)

### **This PDF file includes:**

SI to Figure 5.1 – Fig. S1.

SI to Figure 7.1 – Fig. S2.

SI to Figure 8.1 – Fig. S3.

### **Supplementary Information Text**

**Subhead.** Additional event-related potential plots of all electroencephalograph channels to support in-text 3 channel plots. Rain-cloud plots of contrasts for the post-imperative negative variation included.

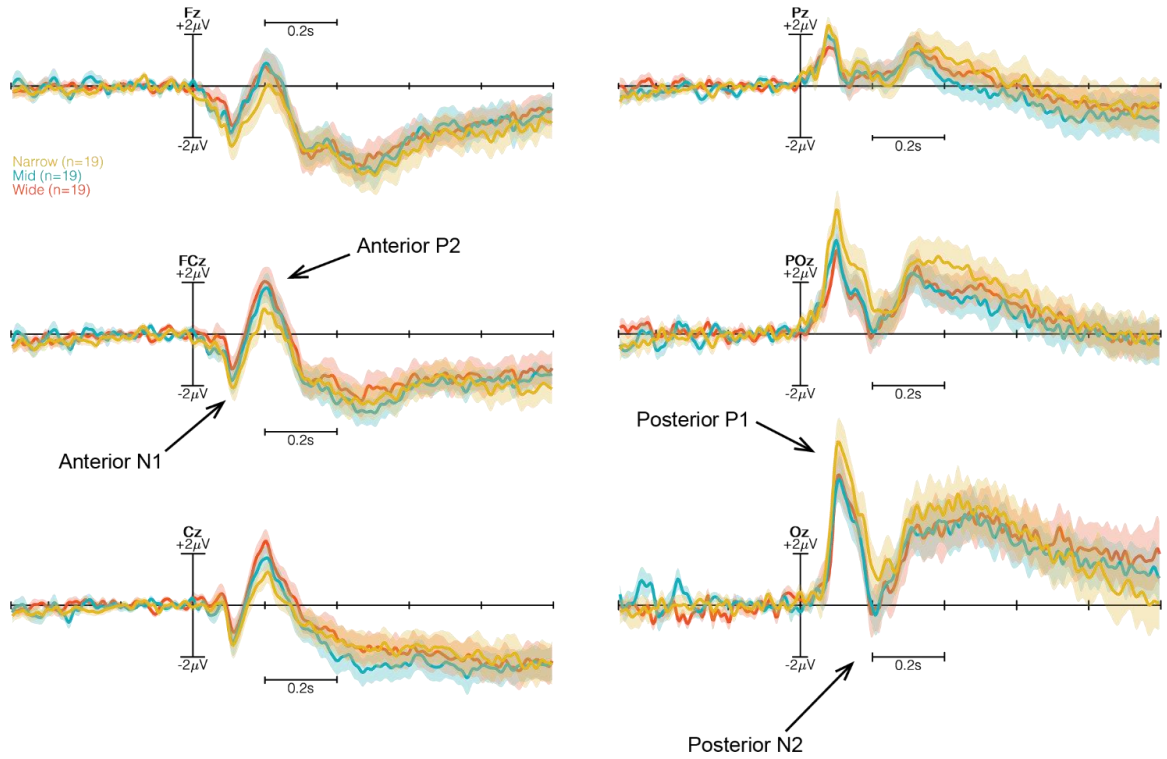

**Fig. S1.** ERP plots of “Lights On” stimulus for all six channels ( $F_z$ ,  $FC_z$ ,  $C_z$ ,  $P_z$ ,  $PO_z$ , and  $O_z$ ). *Narrow* condition in yellow, *Mid* condition in blue, and *Wide* condition in red. N1-P1-complex are marked with arrows.

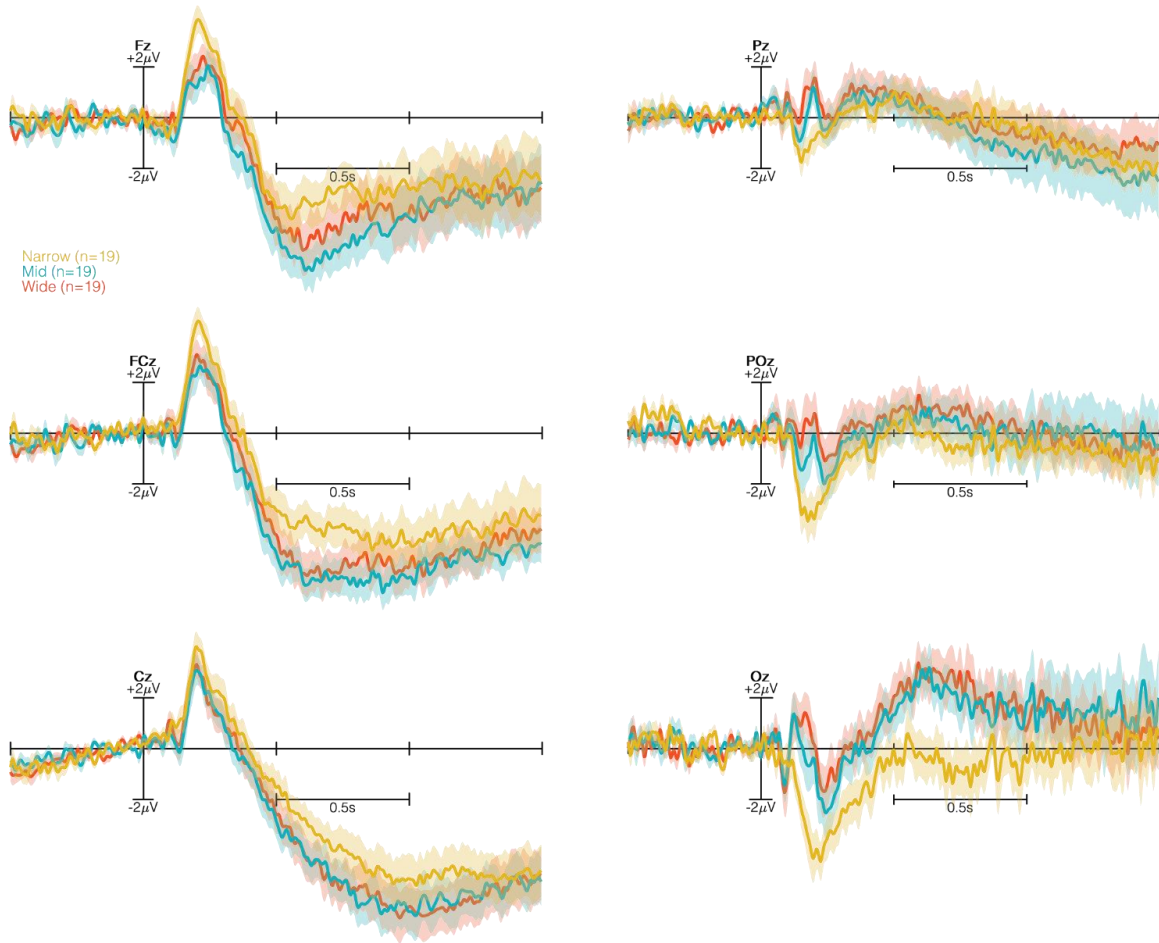

**Fig. S2.** ERP plots of the total six channels only for Go trials. ANOVA with repeated measures of time-locked ERP, where the increasing darkness behind the plots indicates the increasing level of significance. The repeated measures ANOVA revealed  $Fz$  ( $F_{2,36} = 4.546, p = 0.0174$ ),  $FCz$  ( $F_{2,36} = 7.116, p = 0.0025$ ),  $Cz$  ( $F_{2,36} = 4.116, p = 0.0236$ ),  $Pz$  ( $F_{2,36} = 0.089, p = 0.915$ ),  $POz$  ( $F_{2,36} = 1.708, p = 0.196$ ), and  $Oz$  ( $F_{2,36} = 14.39, p < 0.0001$ ). We observed no difference for NoGo—however, we observed a difference within fronto-central and occipital sites for Go trials.

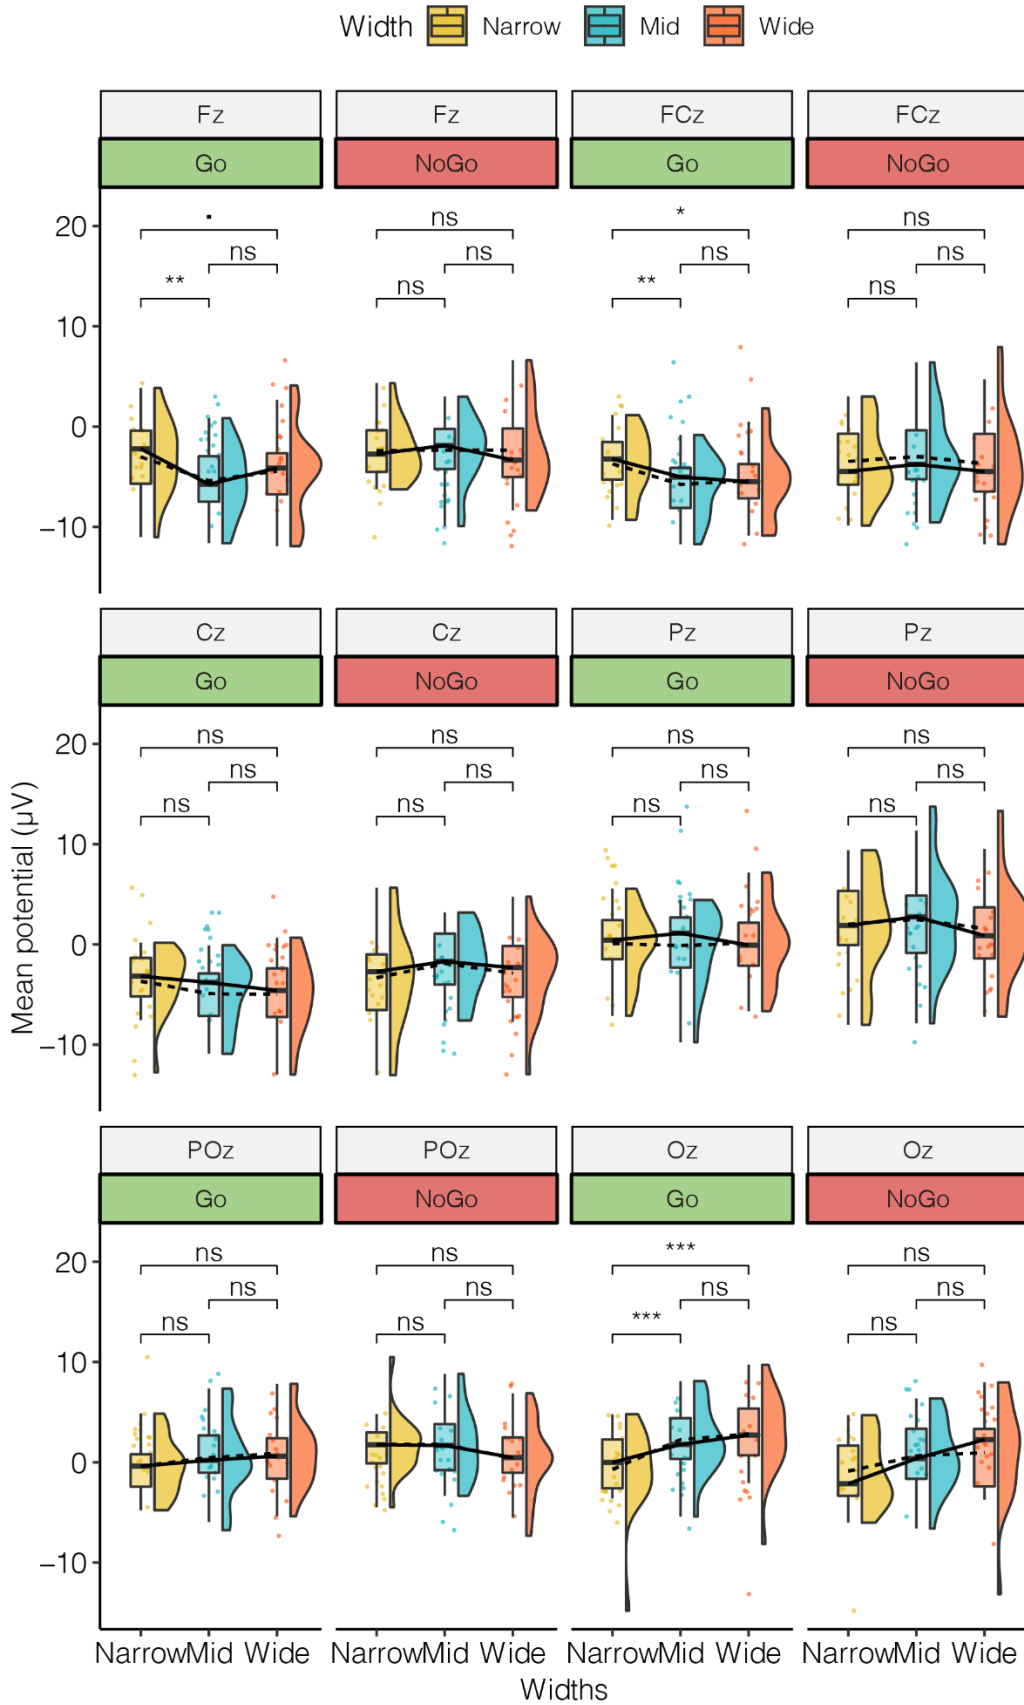

**Fig. S3.** Rain-cloud plot of the mean amplitude of selected six channels between 600 and 800 ms post-imperative stimulus – PINV component. Means are indicated by dashed line, while medians are a solid line. We compared (Tukey HSD) the *Width* within Go and NoGo conditions, and observed only significant differences for the Go condition. We observed differences within fronto-central and occipital sites.
